# Supplementary material for: Genetic Characterization of Carbapenem-Resistant Klebsiella spp. from Municipal and Slaughterhouse Wastewater
Source: MDPI journal article supplement (doi:10.3390/antibiotics11040435), 2022-03-24
Supplement: s1 [file s1]

## Supplementary Material

### **Genetic characterization of carbapenem-resistant *Klebsiella* spp. from municipal and slaughterhouse wastewater**

Mykhailo Savin, Gabriele Bierbaum, Nico T. Mutters, Ricarda Maria Schmithausen, Judith Kreyenschmidt, Isidro García-Meniño, Silvia Schmoger, Annemarie Käsbohrer and Jens Andre Hammerl

#### **Corresponding authors:**

Dr. Mykhailo Savin, Institute for Hygiene and Public Health, University Hospital Bonn,  
Bonn, Venusberg-Campus 1, Building 63, 53127 Bonn, Germany

E-mail: [m.savin@uni-bonn.de](mailto:m.savin@uni-bonn.de)

Dr. Jens Andre Hammerl, Unit Epidemiology, Zoonoses and Antimicrobial Resistances,  
Department of Biological Safety, German Federal Institute for Risk Assessment, Max-Dohrn  
Str. 8-10, D-10589 Berlin, Germany

E-mail: [jens-andre.hammerl@bfr.bund.de](mailto:jens-andre.hammerl@bfr.bund.de)

**Table S1:** Mobile genetic elements detected in carbapenem-resistant *Klebsiella* spp. isolates recovered from municipal WWTPs and their receiving water bodies as well as from process waters of poultry and pig slaughterhouses.

| <b><i>Klebsiella</i> isolate ID</b> | <b>Plasmid replicons detected</b>             | <b>Plasmid-associated AMR</b>              | <b>IS without AMR determinants</b>                                       | <b>IS-associated with AMR determinants</b>                                                                                                                 |
|-------------------------------------|-----------------------------------------------|--------------------------------------------|--------------------------------------------------------------------------|------------------------------------------------------------------------------------------------------------------------------------------------------------|
| 05/10-60                            | IncR                                          | <i>aph(3'')-Ib-aph(6)-Id</i> (IncR)        | IS6100, IS26                                                             | <i>sul2</i> (ISVsa3)                                                                                                                                       |
| 03/11-38                            | IncFII(Yp), Col440I, IncA/C, IncFIB(K)        | n.d.                                       | ISEcl1, ISSen4, IS30, ISEsa2, IS903, cn_4959_IS903, ISEc33, IS102        | <i>bla</i> <sub>SHV-12</sub> (ISAhy2)                                                                                                                      |
| 05/10-83                            | IncFIB(K), IncFII(K), IncFIB(pKPHS1), Col440I | n.d.                                       | IS903, Tn5403, ISEc31, IS102, ISEcl1, ISKpn1, IS5075                     | <i>bla</i> <sub>TEM-1B-<i>sul2-aph(6)-Id-aph(3'')</i>-Ib-<i>bla</i><sub>CTX-M-15</sub></sub> (ISEc9), <i>qnrB1-tet(A)</i> (Tn5403), <i>dfrA14</i> (IS6100) |
| 05/11-32                            | IncR                                          | <i>aph(3'')-Ib-aph(6)-Id</i> (IncR)        | IS6100, IS26                                                             | <i>sul2</i> (ISVsa3)                                                                                                                                       |
| 05/11-43                            | IncFIB(K), Col440I, IncFIB(pKPHS1)            | n.d.                                       | ISKox1, ISKpn42, ISSty2, ISEc31, ISKpn1, ISEcl1, ISSen4, IS5075, ISKpn26 | <i>bla</i> <sub>TEM-1B-<i>sul2-aph(6)-Id-aph(3'')</i>-Ib-<i>bla</i><sub>CTX-M-15</sub></sub> (ISEc9)                                                       |
| 05/13-25                            | IncR                                          | <i>aph(3'')-Ib-aph(6)-Id</i> (IncR)        | IS6100, IS26                                                             | <i>sul2</i> (ISVsa3)                                                                                                                                       |
| 05/10-58                            | IncR                                          | <i>aph(3'')-Ib-aph(6)-Id</i> (IncR)        | IS6100, IS26                                                             | n.d.                                                                                                                                                       |
| 05/11-29                            | IncFII(K), IncFIB(K), Col440II                | n.d.                                       | ISKpn14, cn_5267_ISKpn14, ICEEcoED1a-1, ISKpn33, ISKpn26, ISEc9, ISEcl1  | n.d.                                                                                                                                                       |
| 03/13-21                            | Col440I, IncFII(K))                           | <i>bla</i> <sub>CTX-M-15</sub> (IncFII(K)) | ISEc9, ISSen4, IS26                                                      | <i>dfrA14</i> (IS6100)                                                                                                                                     |
| 04/08-35                            | IncR, ColpVC, IncN                            | n.d.                                       | ISKpn1                                                                   |                                                                                                                                                            |

|             |                                                                                 |                                              |                                                                                                                         |                                                                                                                                               |
|-------------|---------------------------------------------------------------------------------|----------------------------------------------|-------------------------------------------------------------------------------------------------------------------------|-----------------------------------------------------------------------------------------------------------------------------------------------|
| 01/07-41    | IncX4, IncFIB(pKPHS1)                                                           | n.d.                                         | ISEch12, IS26                                                                                                           | <i>qnrS1-bla<sub>LAP-2</sub></i> (ISKpn19),<br><i>qacE-sul1-dfrA1</i> (IS6100)                                                                |
| 05/10-21    | IncFIB(K), IncFII(K),<br>IncHI2A, IncHI2, Col440I                               | n.d.                                         | ISKpn14, ISKpn34,<br>ISKpn43, ISKpn28,<br>ISEsa2, ISEsa1, Tn6196,<br>ISKpn8, IS5075                                     | n.d.                                                                                                                                          |
| 05/10-59    | IncR, IncFIA(HI1)                                                               | n.d.                                         | ICEEcoED1a-1, ISKpn26,<br>ISKpn38, ISEsa2, ISEsa1,<br>ISKpn1, IS5075, ISKpn28                                           | <i>dfrA14</i> (IS6100), <i>bla<sub>CTX-M-15</sub></i> (ISEc9)                                                                                 |
| 03/05-22    | IncFIB(K), IncFII,<br>IncFIA(HI1), IncHI1A,<br>IncHI1B(R27), ColRNAI,<br>IncFII | <i>sul2-aph(6)-Id-aph(3'')-Ib</i><br>(IncQ1) | IS629                                                                                                                   | <i>mph(A)</i> (IS6100), <i>floR</i><br>(ISVsa3), <i>tet(B)</i> (ISVsa5)                                                                       |
| 03/10-46    | IncFIB(K)                                                                       | n.d.                                         | ISEam1                                                                                                                  | <i>qnrS1-aph(6)-Id-aph(3'')-Ib-sul2</i> (ISKpn19),<br><i>mph(A)-qacE-sul1-aadA2-dfrA12</i> (IS6100),<br><i>bla<sub>CTX-M-15</sub></i> (ISEc9) |
| 05/11-30    | IncR                                                                            | n.d.                                         | ISKpn26, IS6100, IS26                                                                                                   | <i>sul2</i> (ISVsa3)                                                                                                                          |
| 03/12-04Bki | IncHI2, IncHI2A, IncR                                                           | n.d.                                         | IS6100, ISKpn21, ISEsa2,<br>ISEsa1, ISKpn26,<br>cn_9071_ISKpn21,<br>Tn6196, ISKpn8, IS102,<br>IS26                      | n.d.                                                                                                                                          |
| 03/11-12    | Col440I, IncFIB(K),<br>IncR, Col(IRGK),<br>Col(IMGS31),<br>IncFIB(pKPHS1)       | n.d.                                         | ISEc33, ISKpn21,<br>ISPpu12, ISApu1,<br>cn_3415_ISApu1, ISEc11,<br>ISAs2, ISKpn8, IS903,<br>ISAeme4, ISSpu2,<br>ISKpn28 | n.d.                                                                                                                                          |

|           |                                                             |                                                                   |                                                                                                                                               |                                                                                                                               |
|-----------|-------------------------------------------------------------|-------------------------------------------------------------------|-----------------------------------------------------------------------------------------------------------------------------------------------|-------------------------------------------------------------------------------------------------------------------------------|
| 05/10-21B | IncHI2, IncHI2A,<br>IncFIB(K), Col440I,<br>IncFII(K)        | n.d.                                                              | ISKpn14, ISCfr26,<br>ISKpn43, ISKpn34,<br>ISKpn28, ISEsa2, ISEsa1,<br>Tn6196, ISKpn1, ISKpn8,<br>IS5075                                       | n.d.                                                                                                                          |
| 05/13-23  | IncHI1B                                                     | <i>tet(A)</i> (IncFIB(Mar))                                       | ISKpn38, IS5075, IS26                                                                                                                         | <i>qnrS1-aph(6)-Id-aph(3")-<br/>Ib-sul2</i> (ISKpn19),<br><i>mph(A)</i> (IS6100), <i>bla</i> <sub>CTX-<br/>M-15</sub> (ISEc9) |
| 03/01-52  | IncFIB(K), IncFII,<br>ColRNAI, Col440II                     | n.d.                                                              | ISEch12, ISSty2,                                                                                                                              | <i>mchF</i> (GIE492)                                                                                                          |
| 05/10-69A | IncFIA(HI1), IncFIB(K),<br>IncFII(K), Col440I,              | n.d.                                                              | ISKpn14, ISPlge4,<br>ISKpn14, ISEc33,<br>ISEc31, ISKpn42,<br>ISSen4, Tn5403, ISEc15,<br>ISKpn21, IS5075,<br>ISKpn26, IS903, IS102,<br>ISKpn28 | <i>bla</i> <sub>TEM-1B</sub> (Tn2)                                                                                            |
| 01/07-40  | IncFIB(pKPHS1), IncX4,<br>Col440I                           | n.d.                                                              | n.d.                                                                                                                                          | <i>qnrS1-bla</i> <sub>LAP-2</sub> (ISKpn19),<br><i>qacE-sul1-dfrA1</i> (IS6100)                                               |
| 03/06-23  | IncFII, IncFIB(K),<br>IncHI1A, IncHI1B(R27),<br>IncFIA(HI1) | <i>sul2-aph(6)-Id-aph(3")-Ib</i><br>(IncQ1), <i>ccI</i> (ColRNAI) | IS629                                                                                                                                         | <i>mph(A)</i> (IS6100), <i>floR</i><br>(ISVsa3), <i>tet(B)</i> (ISVsa5)                                                       |
| 05/10-69B | IncFII(K), Col440I,<br>IncFIA(HI1), IncFIB(K)               | n.d.                                                              | ISKpn14, ISPlge4,<br>ISEc33, ISEc31,<br>ISKpn42, ISSen4,<br>Tn5403, ISEc15,<br>ISKpn21, IS102, IS5075,<br>ISKpn26, ISKpn28                    | <i>bla</i> <sub>TEM-1B</sub> (Tn2)                                                                                            |
| 05/10-20A | Col440I, IncHI2,<br>IncHI2A, IncFIB(K),<br>IncFII(K)        | n.d.                                                              | ISKpn14, ISCfr26,<br>ISKpn43, ISKpn34,                                                                                                        | n.d.                                                                                                                          |

|           |                                                |      |                                                                                              |                                                                |
|-----------|------------------------------------------------|------|----------------------------------------------------------------------------------------------|----------------------------------------------------------------|
|           |                                                |      | ISKpn28, ISEsa2, ISEsa1, Tn6196, ISKpn8, IS5075                                              |                                                                |
| 05/10-71  | IncFIB(K), Col440I, IncFII(K)                  | n.d. | ISKpn42, ISSen4, ISKpn14, ISPlge4, IS5075, ISEc33, ISEc31, Tn5403, ISKpn21, ISKpn26, ISKpn28 | n.d.                                                           |
| 05/13-31  | n.d.                                           | n.d. | n.d.                                                                                         | <i>dfrA14</i> (IS6100), <i>bla</i> <sub>CTX-M-15</sub> (ISEc9) |
| 05/10-20B | IncFIB(K), IncFII(K), Col440I, IncHI2, IncHI2A | n.d. | ISKpn14, ISCfr26, ISKpn43, ISKpn34, ISKpn28, ISEsa2, ISEsa1, Tn6196, ISKpn1, ISKpn8, IS5075  | n.d.                                                           |
| 03/11-28  | IncFIB(K)                                      | n.d. | ICEEcoED1a, IS903, ISEc15, IS102, ISEc11, IS5075                                             | <i>dfrA14</i> (IS6100)                                         |

n.d., not detected; IS, insertion sequence; cn, composite transposon; Tn, transposon; ISE, insertion sequence element; ICE, Integrative Conjugative Element
